# Supplementary material
Source: PubMed Central journal article supplement (PMC3189222)
Supplement: NIHMS254649-supplement-01.pdf [file NIHMS254649-supplement-01.pdf]

Neuron, Volume 68

Supplemental Information

## Bidirectional Plasticity Gated by Hyperpolarization Controls the Gain of Postsynaptic Firing Responses at Central Vestibular Nerve Synapses

Lauren E. McElvain, Martha W. Bagnall, Alexandra Sakatos, and Sascha du Lac

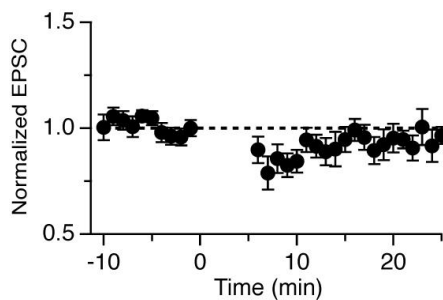

**Figure S1:** Enhancement of NMDA-Rs interferes with the induction of LTP in YFP-16 neurons. Application of the 100 Hz stim plus hyperpolarization protocol to YFP-16 neurons bathed in low-magnesium (0.3 mM) Ringer's solution failed to induce LTP. Data are as shown  $\pm$  SEM.

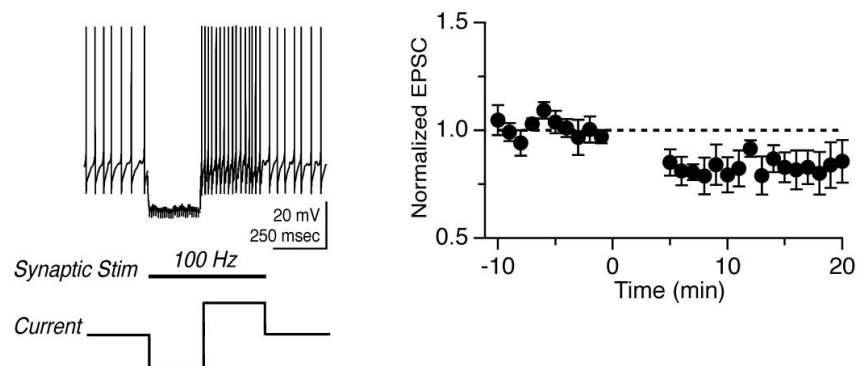

**Figure S2:** Elevation of postsynaptic firing rate following hyperpolarization is not sufficient to induce LTP in non-rebounding neurons. In YFP-16 neurons lacking intrinsic post-hyperpolarization rebound firing, a modified 100 Hz stim plus hyperpolarization

protocol was applied in which a 300-msec depolarizing current step was injected immediately following the hyperpolarizing step to mimic rebound (left). This protocol elevated the post-hyperpolarization firing rate by  $35.2 \pm 6.1$  Hz but failed to induce LTP (right). Data are as shown  $\pm$  SEM.

|                                          | 100 Hz Stim Protocol |                 |                | 100 Hz Stim plus Hyperpolarization Protocol |                 |                |
|------------------------------------------|----------------------|-----------------|----------------|---------------------------------------------|-----------------|----------------|
|                                          | Pre                  | Post            | <i>P</i> value | Pre                                         | Post            | <i>P</i> value |
| <b>AP width (ms)</b>                     | $0.67 \pm 0.05$      | $0.67 \pm 0.04$ | 0.83           | $0.61 \pm 0.03$                             | $0.61 \pm 0.03$ | 0.99           |
| <b>Threshold (mV)</b>                    | $-51.9 \pm 1.3$      | $-53.1 \pm 1.2$ | 0.08           | $-50.6 \pm 1.0$                             | $-52.0 \pm 1.2$ | 0.09           |
| <b>Input res. (M<math>\Omega</math>)</b> | $71.1 \pm 15.6$      | $71.5 \pm 15.8$ | 0.93           | $71.9 \pm 12.5$                             | $74.2 \pm 13.8$ | 0.15           |
| <b>Gain (Hz/nA)</b>                      | $219 \pm 32$         | $212 \pm 30$    | 0.31           | $238 \pm 24$                                | $238 \pm 26$    | 0.71           |

**Table S1:** Intrinsic characteristics of YFP-16 MVN neurons before and after synaptic plasticity induction protocols. Values indicate mean  $\pm$  SEM.
